# Supplementary material
Source: PubMed Central journal article supplement (PMC4042146)
Supplement: jcbn13-85s01.pdf [file jcbn13-85s01.pdf]

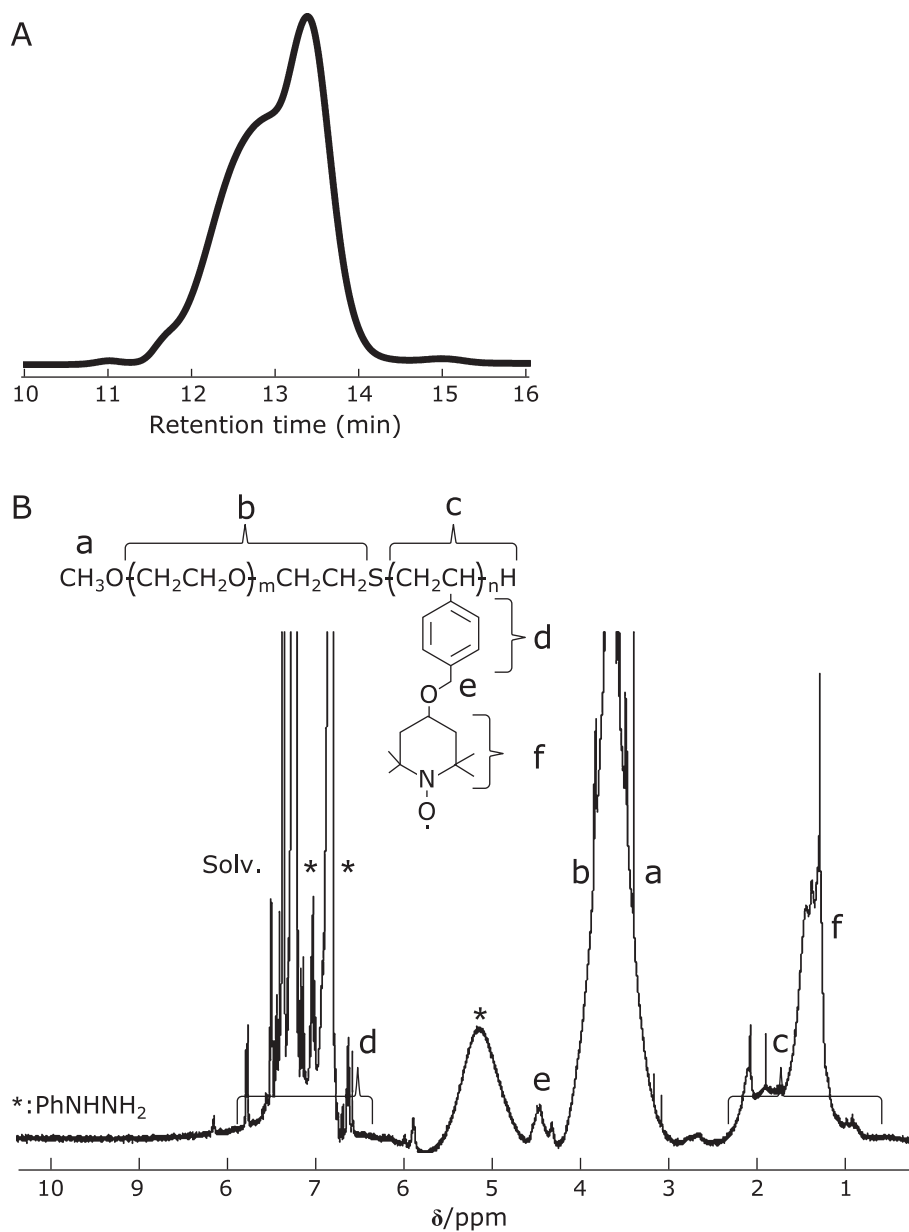

**Supplemental Fig. 1.** Size exclusion chromatography (SEC) diagram (A) and <sup>1</sup>H NMR spectrum (B) of MeO-PEG-*b*-PMOT. SEC apparatus, TOSOH HLC-8120GPC; detector, RI; column, TSK gel SuperHZ4000 + 3000; solvent, THF (containing 2 wt% triethylamine); flow rate, 0.35 mL/min; calibration, standard PEGs. <sup>1</sup>H NMR spectrum of MeO-PEG-*b*-PMOT was obtained in the presence of phenylhydrazine on a spectrometer (JEOL EX-270) and measured in CDCl<sub>3</sub> at 270 MHz at 25°C with 64 scans.
