# Supplementary material
Source: PubMed Central journal article supplement (PMC4042146)
Supplement: jcbn13-85s02.pdf [file jcbn13-85s02.pdf]

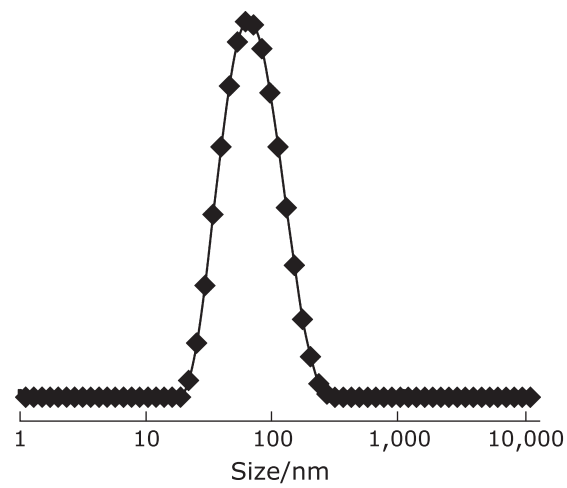

**Supplemental Fig. 2.** Size distribution of the RNP<sup>o</sup> analyzed by dynamic light scattering (DLS) (Malvern Instrument Ltd., UK) in aqueous media at 25°C. The RNP<sup>o</sup> thus obtained showed a unimodal distribution in the histogram analysis (41 nm, polydispersity index = 0.18).
