# Supplementary material
Source: PubMed Central journal article supplement (PMC4042146)
Supplement: jcbn13-85s03.pdf [file jcbn13-85s03.pdf]

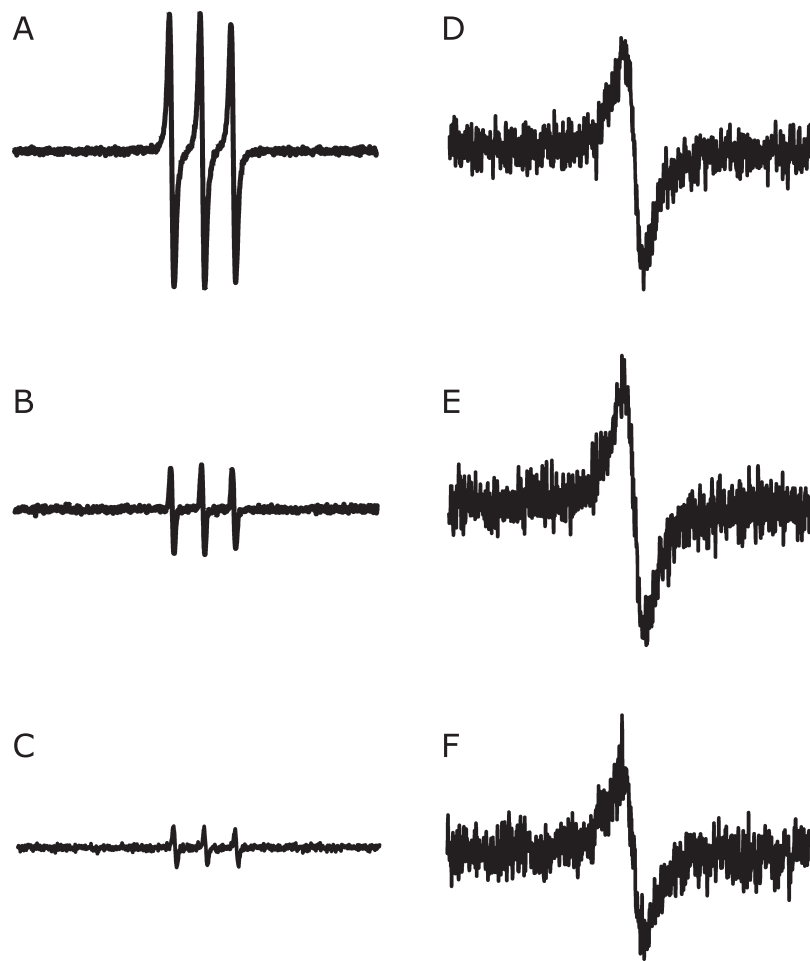

**Supplemental Fig. 3.** ESR spectra of (A–C) LMW-TEMPOL and (D–F) RNP<sup>0</sup> in rat whole blood at 0, 3 and 6 h after LMW-TEMPOL or RNP<sup>0</sup> solution in saline was added to rat whole blood, respectively. The ESR signal of LMW-TEMPOL shows a sharp triplet signals due to an interaction between <sup>14</sup>N nuclei and the unpaired electron in the dilute solution. In contrast, since RNP<sup>0</sup> confines nitroxide radicals in the hydrophobic core, the ESR signal of RNP<sup>0</sup> is broad, which is explained by the exchange interaction of the TEMPO radicals. Broad ESR signal of RNP<sup>0</sup> was observed after RNP<sup>0</sup> was added to rat whole blood, indicating that the confinement of nitroxide radicals in hydrophobic core of RNP<sup>0</sup> even in blood (see Fig. 3D–F). On the other hand, the ESR signal of LMW-TEMPOL showed a sharp triplet signals in blood, which decreased in a time-dependent manner (see Fig. 3A–C).
